# Supplementary material for: RSK1-driven TRIM28/E2F1 feedback loop promotes castration-resistant prostate cancer progression
Source: JCI journal article supplement (doi:10.1172/jci185119), 2025-06-15
Supplement: sd1 [file 1]

# **RSK1-driven TRIM28/E2F1 feedback loop promotes castration-resistant prostate cancer progression**

Miyeong Kim<sup>1</sup>, Jinpeng Liu<sup>2</sup>, Yanquan Zhang<sup>1</sup>, Ruixin Wang<sup>1</sup>, Ryan Goettl<sup>2</sup>, Jennifer Grasso<sup>1</sup>, Derek B. Allison<sup>3</sup>, Chi Wang<sup>2</sup>, Tianyan Gao<sup>4</sup>, Xiaoqi Liu<sup>1</sup>, Ka-Wing Fong<sup>1,5\*</sup>

## **Content:**

**Supplementary Figure S1: TRIM28 is a novel E2F1-target in advanced prostate cancer**

**Supplementary Figure S2: TRIM28 regulates the E2F pathway in advanced prostate cancer**

**Supplementary Figure S3: TRIM28 regulates E2F1 genomic function**

**Supplementary Figure S4: pS473-TRIM28 promotes transcriptional activation of E2F1**

**Supplementary Figure S5: RSK1 kinase directly phosphorylates TRIM28 at S473**

**Supplementary Figure S6: pS473-TRIM28 promotes CRPC progression**

**Supplementary Figure S7: The oncogenic function of RSK1 is partially mediated by phosphorylated TRIM28 and E2F1.**

**Supplementary Figure S8: Exploitation of the RSK1-TRIM28-E2F1 axis as a vulnerability in Rb-deficient PCa**

**Supplementary Table S1: Primers used in this study.**

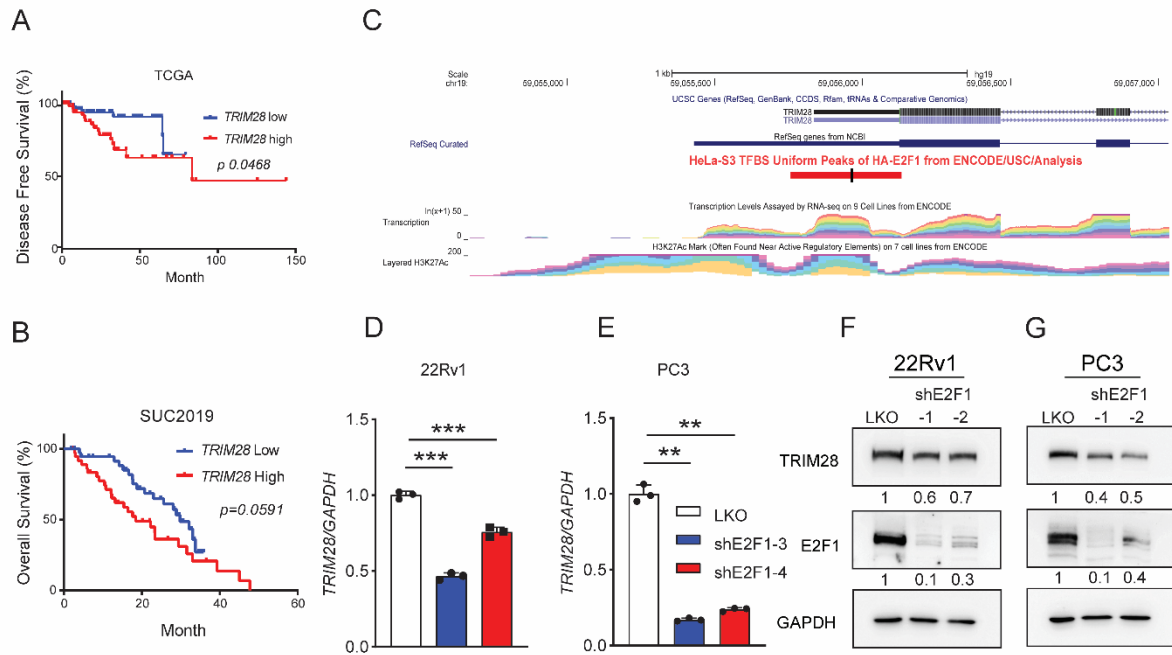

**Supplementary Figure S1. (A-B)** Kaplan-Meier plot depicts disease free survival of PCa patients stratified by *TRIM28*-high (1-SD above mean) and -low expression (1-SD below mean) (n=484) and overall survival of advanced PCa patients stratified by *TRIM28*-high (above median value) and -low expression (below median value) (n=76). Significant differences between groups was determined by one-way ANOVA. **(C)** Genome browser track depicts E2F1 binding-site (Red region) at the promoter of *TRIM28* loci. **(D-G)** 22Rv1 and PC3 cells were infected by 2 shRNAs targeting *E2F1*. RNA was harvested for qPCR analysis of *TRIM28* mRNA levels (D,E), while protein lysates were subjected to IB analysis against E2F1 and TRIM28 (F,G). The qPCR data are shown as mean  $\pm$  SEM, n=3. Statistical analysis was performed using a two-tailed unpaired Student's t-test, with the Holm-Bonferroni method applied to correct for multiple comparisons. \*\* $p < 0.01$ , \*\*\* $p < 0.001$ . **(Related to Fig.1)**

A

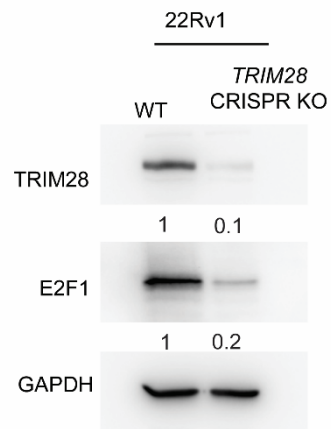

**Supplementary Figure S2. (A)** Protein lysate of 22Rv1 WT and *TRIM28* CRISPR KO cells were subjected to IB against TRIM28 and E2F1. **(Related to Fig.2)**

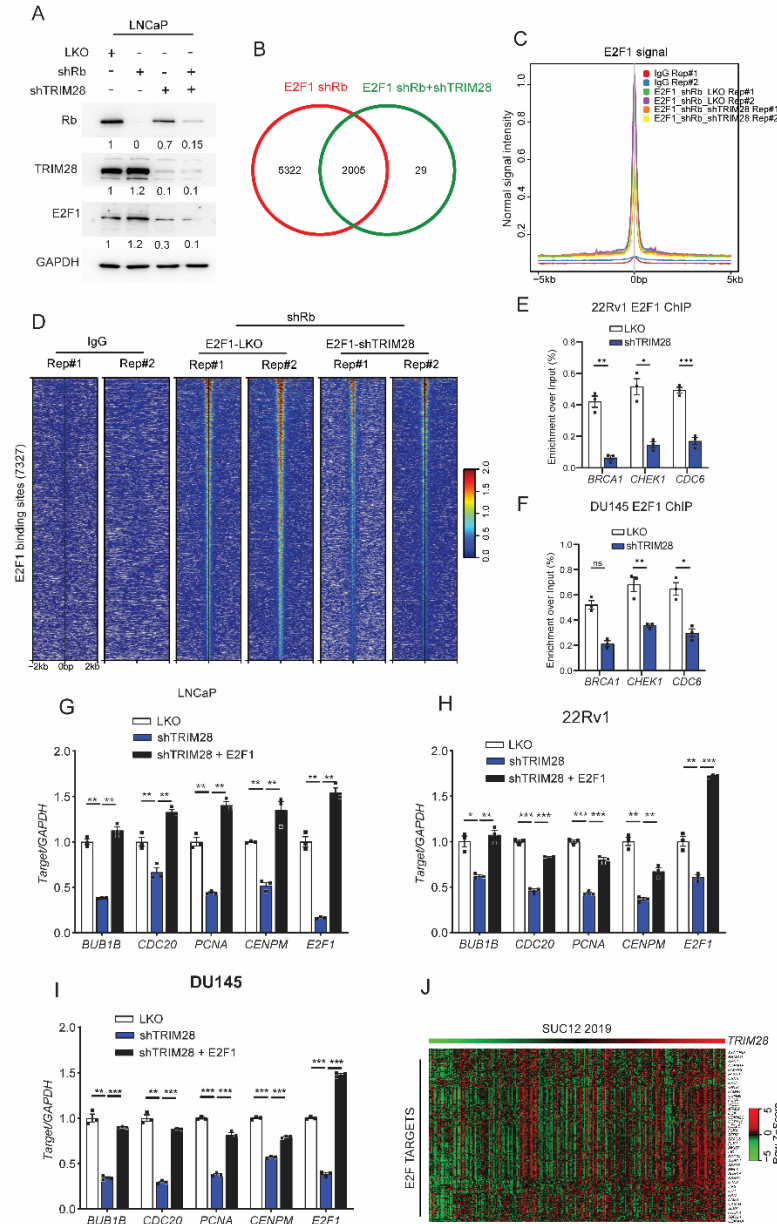

**Supplementary Figure S3. (A-D)** E2F1 CUT&RUN-seq was performed using LNCaP cells with shRb along with LKO and shTRIM28 (A). The E2F1 peak was called by MACS2, and the venn diagram indicates the overlapping of E2F1 binding sites for each treatment (B). The intensity plot depicts the ChIP-Seq peak intensity around peak center  $\pm 5$  kb (C). The heatmaps indicate the E2F1 CUT&RUN-seq signal at E2F1 binding sites  $\pm 2$  kb (D). **(E,F)** A subset of E2F targets were subjected to qPCR analysis of 22Rv1 and DU145 cells. The qPCR data are shown as mean  $\pm$  SEM,  $n=3$ . **(G-I)** The qPCR analysis was performed in LNCaP (G), 22Rv1 (H) and DU145 (I) cells with the indicated treatment. The qPCR data are shown as mean  $\pm$  SEM,  $n=3$ . Statistical analysis was performed using a two-tailed unpaired Student's t-test, with the Holm-Bonferroni method applied to correct for multiple comparisons.  $**p < 0.01$ ,  $***p < 0.001$ . **(J)** Heatmap showing the levels of E2F-target genes in the CRPC samples from SUC12 2019 study (N=266) sorted by TRIM28. (Related to Fig.3)

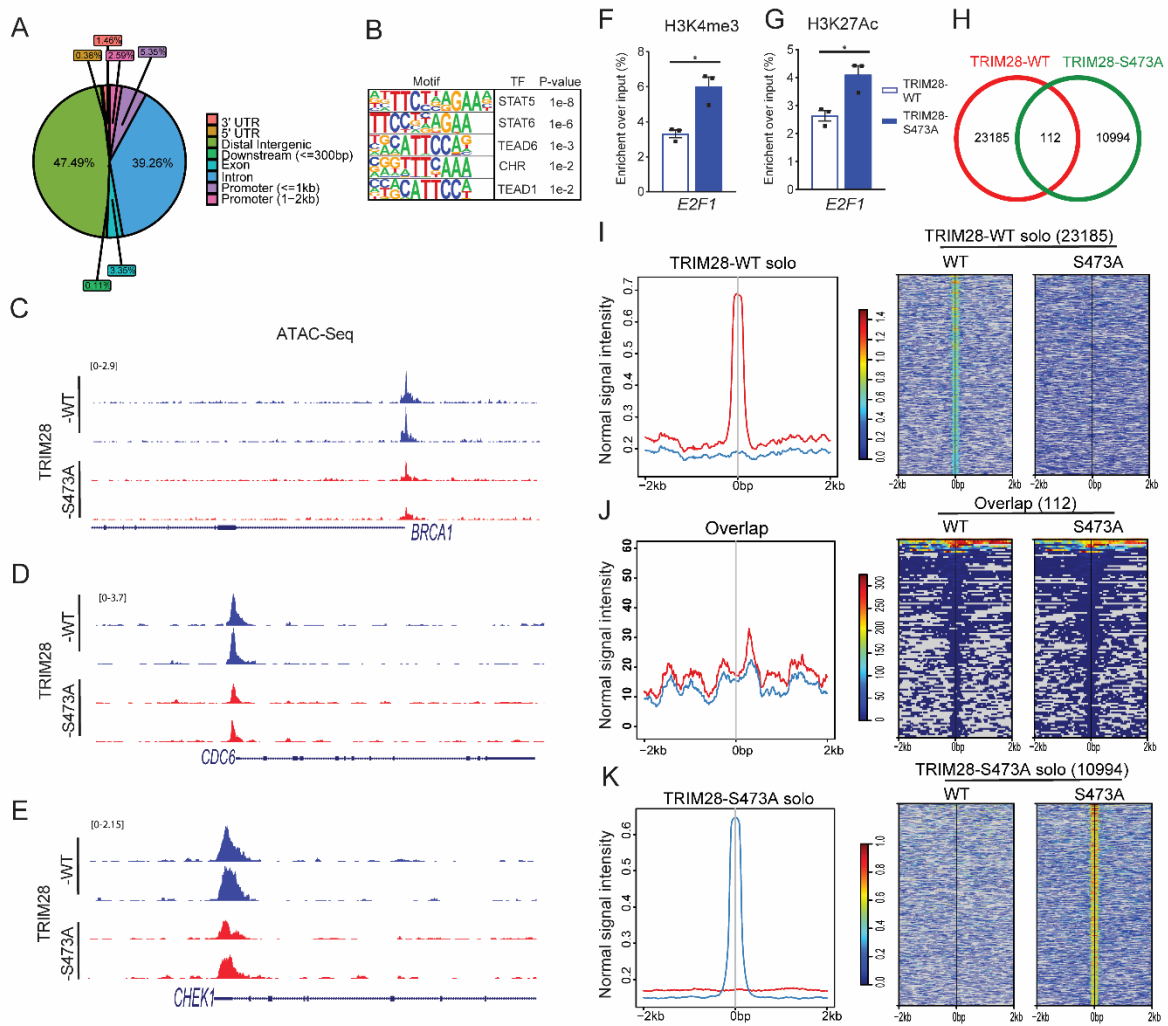

**Supplementary Figure S4.** (A) Pie chart depicting the genome distribution of IgG binding sites. (B) Transcription factor motif analysis of TRIM28 binding sites was performed by using HOMER. (C-E) The ATAC-seq genome browser tracks show representative E2F gene targets in C4-2B cells receiving indicated treatment. (F,G) pS473-TRIM28 imposes chromatin remodeling. H3K4me3 (F), and H3K27Ac (G) ChIP were conducted using shTRIM28-treated C4-2B cells rescued by TRIM28-S473A, and TRIM28-WT. qPCR analysis targeting the *E2F1* gene was performed and normalized to input. The qPCR data are shown as mean  $\pm$  SEM,  $n=3$ . Two-tailed unpaired Student's *t*-test,  $*p < 0.05$ , (H-K) TRIM28 CUT&RUN-seq was performed using C4-2B with *TRIM28*-KD rescued by lenti-HAF TRIM28-WT and the S473A mutant. The TRIM28 peak was called by MACS2, and the venn diagram indicates the overlapping of TRIM28 binding sites for each treatment (H). The intensity plot and heatmap depict the CUT&RUN-seq peak intensity at TRIM28-WT solo, S473A-solo and overlapping binding sites around peak center  $\pm 2$  kb (I-K). (Related to Fig.4)

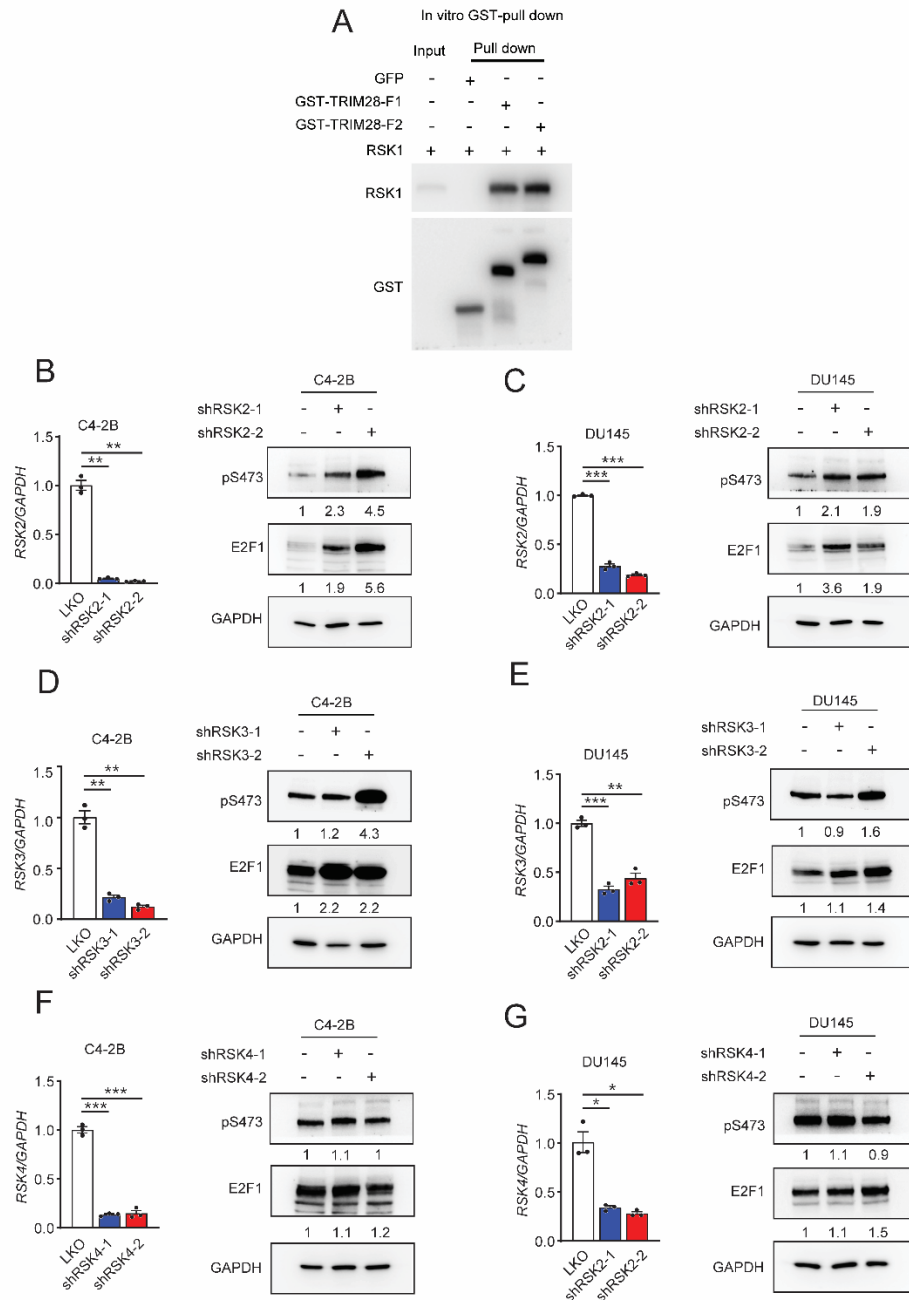

**Supplementary Figure S5. (A)** GST-pulldown assay was performed using *E. coli*-expressed GST-TRIM28 fragments (F1-F2) along with RSK1 protein. **(B-G)** RNA and protein lysates were harvested from C42B and DU145 cells infected by lentiviral supernatant containing LKO and 2-independent shRNA targeting *RSK2-RSK4* for 4 days, followed by qPCR analysis for *RSK2-RSK4* and IB against pS473, E2F1 and GAPDH. The qPCR data are shown as mean  $\pm$  SEM,  $n=3$ . Statistical analysis was performed using a two-tailed unpaired Student's t-test, with the Holm-Bonferroni method applied to correct for multiple comparisons. \* $p < 0.05$ , \*\* $p < 0.01$ , \*\*\* $p < 0.001$ . **(Related to Fig.5)**

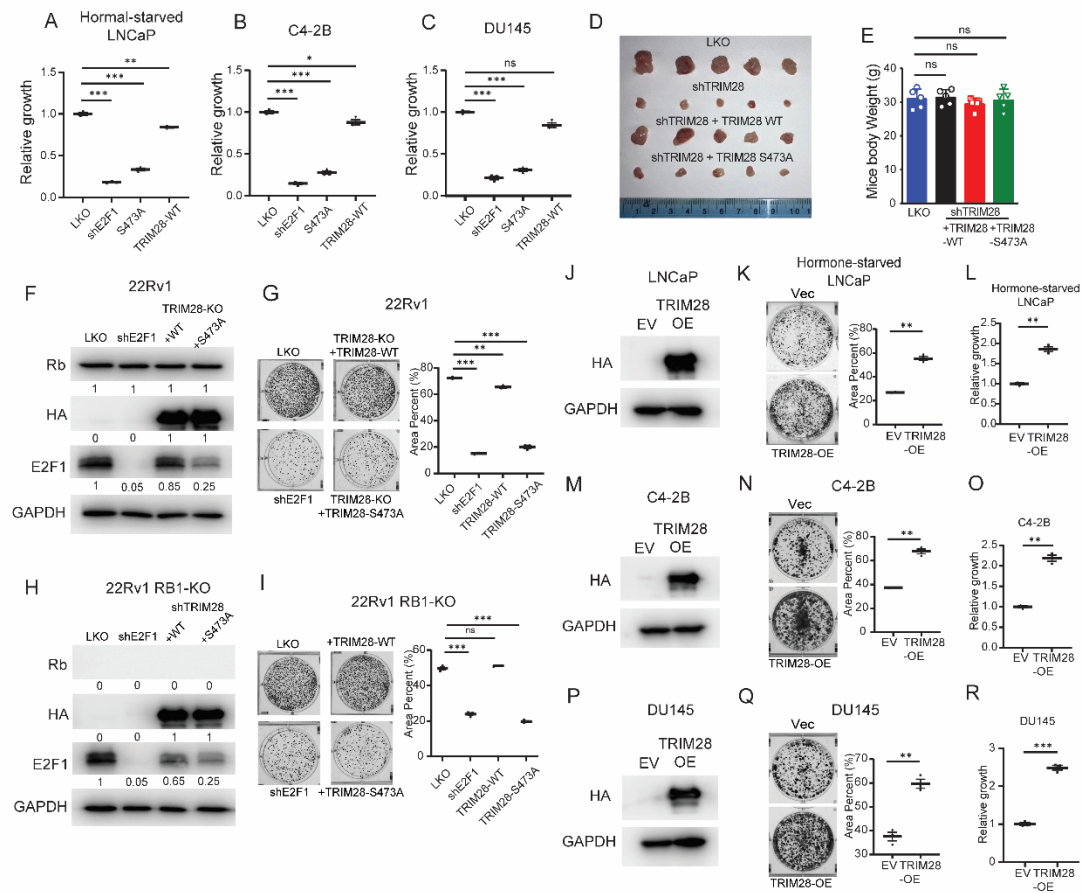

**Supplementary Figure S6.** (A-C)  $2.5\text{-}8 \times 10^3$  cells with the indicated treatment were passed into a 96-well plate for 5 days and then analyzed using the WST-1 proliferation assay (A-C). Y-axis: Relative growth to control group. Data are shown as mean  $\pm$  SEM,  $n=3$ . Statistical analysis was performed using a two-tailed unpaired Student's *t*-test, with the Holm-Bonferroni method applied to correct for multiple comparisons. \* $p < 0.05$ , \*\* $p < 0.01$ , \*\*\* $p < 0.001$ . ns: not significant. (D,E) Images and mice body weight of xenograft experiment from Figure 6G. (F-I) 22Rv1-WT (F,G) and *RB1*-KO (H,I) cells receiving the indicated treatment were analyzed by colony formation assay. Quantification was conducted by image J (colony area plugin) and presented as mean  $\pm$  SEM,  $n=3$ . Statistical analysis was performed using a two-tailed unpaired Student's *t*-test, with the Holm-Bonferroni method applied to correct for multiple comparisons. \*\* $p < 0.01$ , \*\*\* $p < 0.001$ . ns: not significant. (J-R) Hormone-starved LNCaP, C4-2B and DU145 cells expressing empty vector or HA-Flag-tagged TRIM28 were subjected to IB (J, M, P), the colony formation assay (K, N, Q) and WST-1 proliferation assay (L, O, R), respectively. Data are shown as mean  $\pm$  SEM,  $n=3$ . Two-tailed unpaired Student's *t*-test, \*\* $p < 0.01$ , \*\*\* $p < 0.001$ . ns: not significant. (Related to Fig.6)



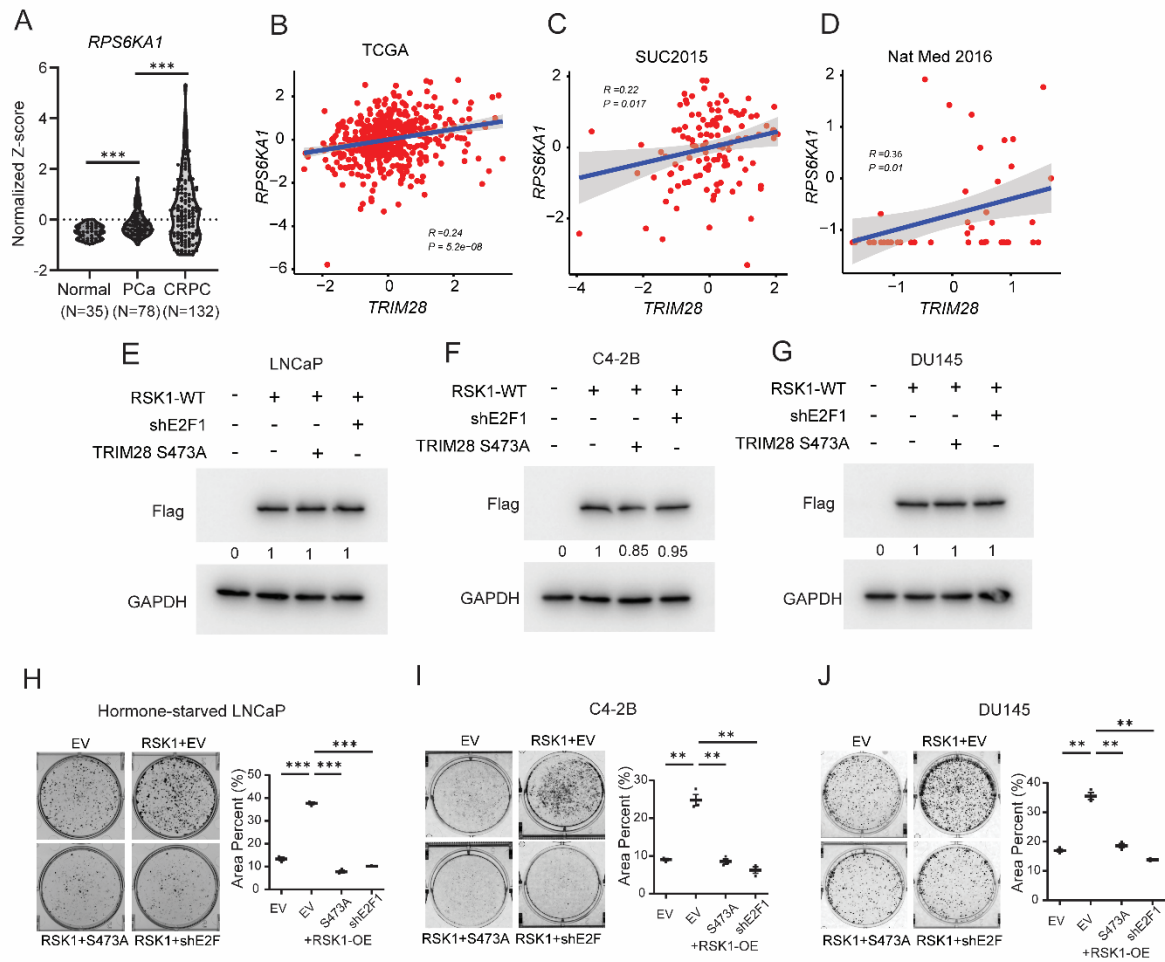

**Supplementary Figure S7. (A)** *RPS6KA1* (*RSK1*) RNA expression in Pca patient cohort (DbGAP). **(B-D)** The correlation of *TRIM28* and *RPS6KA1* (*RSK1*) expression in 3 patient cohorts. TCGA (n=491). SUC2015 (n=118). Nat Med 2016 (n=49). Statistical analysis is based on linear regression. **(E-J)** Hormone-starved LNCaP, C4-2B and DU145 cells with the indicated treatment were harvested for IB (E-G) and subjected to the colony formation assay for 7-14 days (H-J). Quantification was conducted by image J (colony area plugin) and presented as mean  $\pm$  SEM, n=3. Statistical analysis was performed using a two-tailed unpaired Student's t-test, with the Holm-Bonferroni method applied to correct for multiple comparisons. \*\*p < 0.01, \*\*\*p < 0.001. **(Related to Fig.6)**



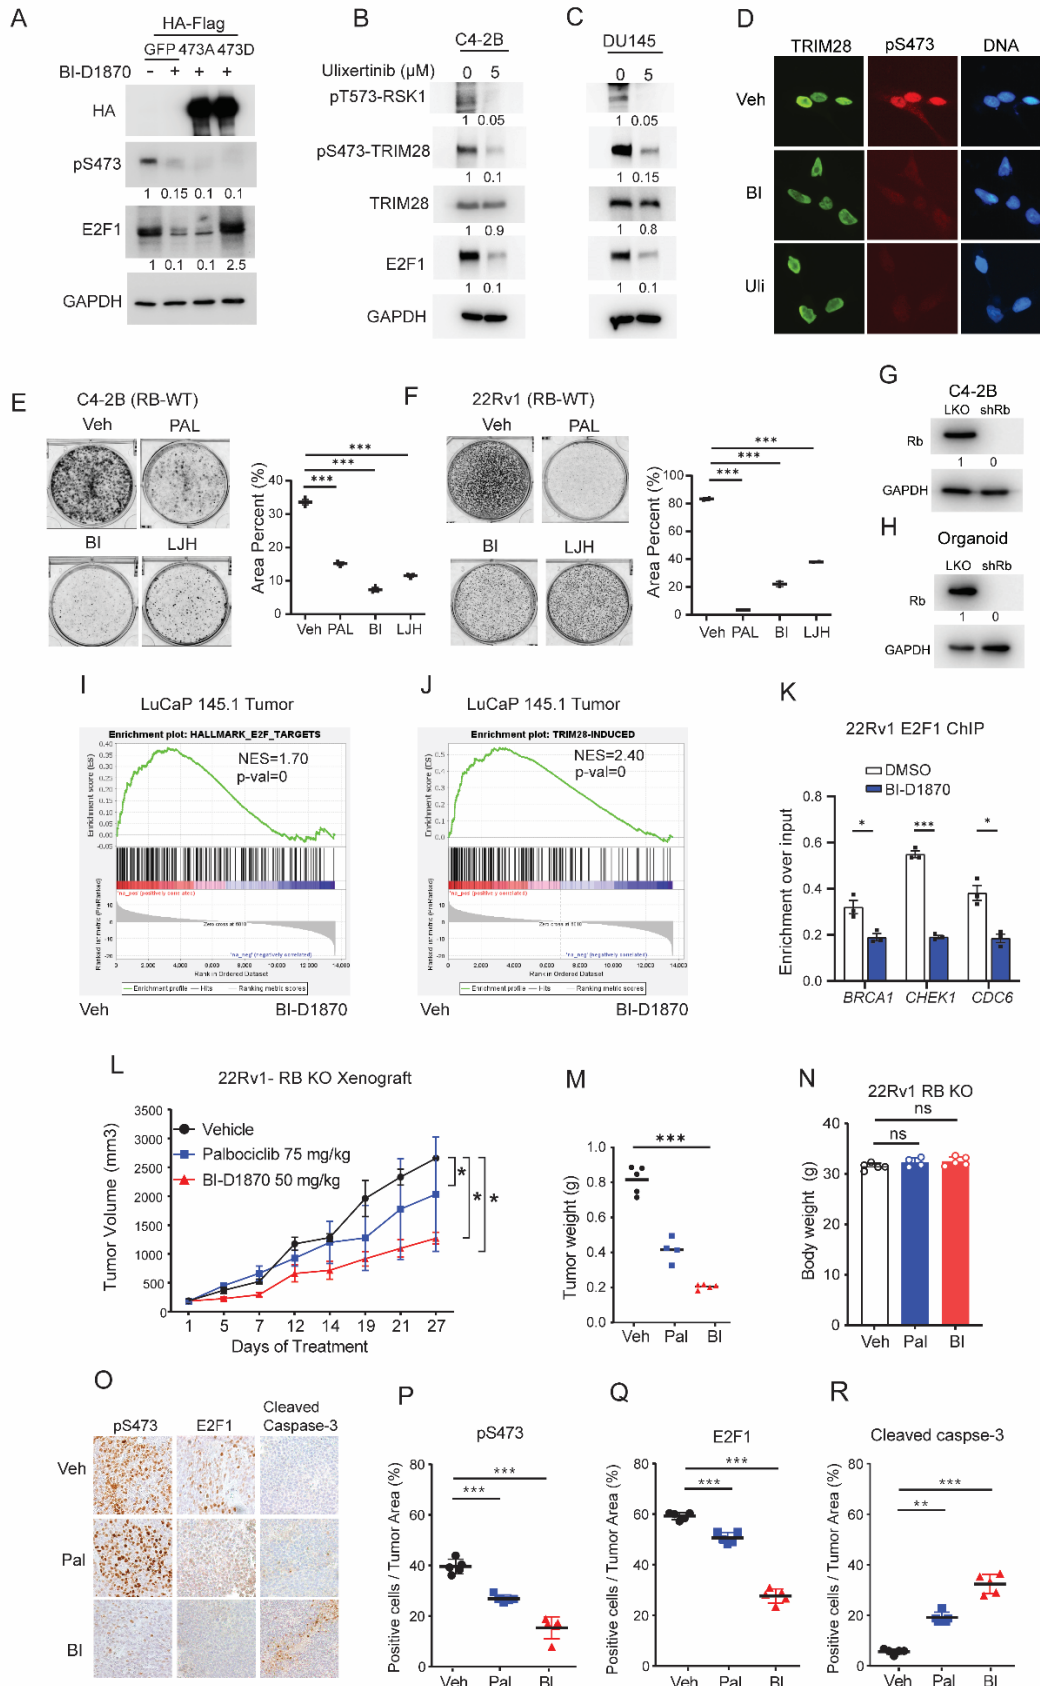

**Supplementary Figure S8.** (A) C4-2B stably expressing indicated proteins were treated with Veh or BI-D1870 before being harvested for IB. (B-C) C4-2B (B) and DU145 (C) cells treated with Veh and ERK inhibitor (Ulixertinib) were harvested for IB against p-RSK, pS473-TRIM28, and E2F1. (D) Either BI-D1870 and Ulixertinib treatment diminishes pS473-TRIM28 immunostaining signal in C4-2B. (E-F) RB1-WT C4-2B or 22Rv1 cells treated by Veh, Palbociclib (500nM), BI-D1870 (1μM), LJH685 (5μM) were subjected to a colony formation assay. Quantification was conducted by image J (colony area plugin) and presented as mean ± SEM, n=3. Statistical analysis was performed using a two-tailed unpaired Student's t-test, with the Holm-Bonferroni method applied to correct for multiple comparisons. \*\*\*p < 0.001. (G,H) IB were performed to validate the Rb-KD in C4-2B cells and organoids. (I,J) RNA-seq analyses of LuCaP145.1 tumor. GSEA analysis showing that E2F pathway (I) and TRIM28-induced geneset (J) were significantly inhibited by BI-D1870 treatment. (K) E2F1 ChIP-PCR was performed using 22Rv1 cells treated with DMSO and 10μM BI-D1870 for 2 days. (L-R) NGS mice were implanted subcutaneously with 22Rv1-*RBI*-KO tumors, followed by treatment with vehicle, palbociclib (75 mg/kg) and BI-D1870 (50 mg/kg) for 3 weeks. Tumor sizes were plotted against days of treatment (L) and the data were analyzed by two-way ANOVA followed by the Tukey-corrected multiple-comparison test (mean ± SEM, n=5, \*p < 0.05). Tumor weight was presented as a boxplot (M) and the toxicity was evaluated by mice body weight (N). At the endpoint, paraffin-embedded tumor tissues were subjected to IHC assay (O), followed by quantification (P-R). Data are shown as mean ± SEM, n=3. Statistical analysis was performed using a two-tailed unpaired Student's t-test, with the Holm-Bonferroni method applied to correct for multiple comparisons. \*\*p < 0.01, \*\*\*p < 0.001. ns: not significant. (Related to Fig.7)

**Supplementary Table S1: Primers used in this study.**

| <b>qPCR primers</b>     | <b>Sequence</b>         |
|-------------------------|-------------------------|
| E2F1 F                  | ACGCTATGAGACCTCACTGAA   |
| E2F1 R                  | TCCTGGGTCAACCCCTCAAG    |
| E2F2 F                  | CGTCCCTGAGTTCCCAACC     |
| E2F2 R                  | GCGAAGTGTCATACCGAGTCTT  |
| E2F3 F                  | TCCCTAAACCCGCTTCCAAAG   |
| E2F3 R                  | AGTCTGCTGTAAGAGGTTGGC   |
| GAPDH F                 | TGCACCACCAACTGCTTAGC    |
| GAPDH R                 | GGCATGGACTGTGGTCATGAG   |
| RSK2 F                  | AGGGCAGGGATCATTGGAAG    |
| RSK2 R                  | GGCCTTCTTCAATACCTTCATGG |
| RSK3 F                  | GAAGAAGGCGTCGTGAAGGAG   |
| RSK3 R                  | CCGAACCTTTAGGGTGGCTTT   |
| RSK4 F                  | GCCCTGGGACCGAGAAATG     |
| RSK4 R                  | TGAGCAACTCAAACGTGTCAG   |
| TRIM28 F                | TGAGACCTGTGTAGAGGCG     |
| TRIM28 R                | CGTTCACCATCCCGAGACTT    |
| TRIM28 F                | CGGGATGGTGAACGTACTGTC   |
| TRIM28 R                | GTCTCGGCAGGTGAGAGTATC   |
| BUB1B F                 | AAATGACCCTCTGGATGTTTGG  |
| BUB1B R                 | GCATAAACGCCCTAATTAAAGCC |
| CDC20 F                 | GCACAGTTCGCGTTCGAGA     |
| CDC20 R                 | CTGGATTTGCCAGGAGTTCGG   |
| PCNA F                  | CCTGCTGGGATATTAGCTCCA   |
| PCNA R                  | CAGCGGTAGGTGTCGAAGC     |
| CENPM F                 | GCGGACTCGATGCTCAAAGA    |
| CENPM R                 | TTCTGGAGACTGTATTTGCTGTG |
| <b>ChIP-PCR primers</b> | <b>Sequence</b>         |
| E2F1 pF                 | GGCTGTGGAACCTGATGATCC   |
| E2F1 pR                 | CACGTGACCCTCAACCTGTA    |
| TRIM28 pF               | TTCTGTGTGGTCTGGAGGTG    |
| TRIM28 pR               | GTGGGGTATGCGAACCTTTA    |
| BRCA1 pF                | AAGCCGCAACTGGAAGAGTA    |
| BRCA1 pR                | CCGGATGACGTAAAAGGAAA    |
| CHEK1 pF                | TGGAGGAATGGTACCAGGAG    |
| CHEK1 pR                | GGACTCTTCCTTGGGGTTCT    |
| CDC6 pF                 | CAGTTTGTTTCAGGGGCTTGT   |
| CDC6 pR                 | TCTTTCCACCTCCTCAGTGC    |
|                         |                         |
|                         |                         |
|                         |                         |
|                         |                         |
|                         |                         |

| Cloning primers          | Sequence                                      |
|--------------------------|-----------------------------------------------|
| CA-RSK1 (Y702A) cF       | GGCTGCCACGgccTCCGCACTCA                       |
| CA-RSK1 (Y702A) cR       | ATGGCTCCCTTCACAAGC                            |
| KD-RSK1 (K447R) cF       | GTATGCTGTCgcgGTCATTGATAAGAGCAAG               |
| KD-RSK1 (K447R) cR       | TCCATGTTGGTGGCCTTG                            |
| KD-RSK1 (K94R) cF        | GTATGCTATGgcgGTGCTGAAGAAGGCAACG               |
| KD-RSK1 (K94R) cR        | AGGTGCCCCACTGTCAGGC                           |
| pGEX TRIM28 1-420aa cF   | TGAGAATTCCCGGGTCGA                            |
| pGEX TRIM28 1-420aa cR   | AGGGCCTGTTGAGTTAGTG                           |
| pGEX TRIM28 421-835aa cF | GCACCCATGGCCCCCTCCA                           |
| pGEX TRIM28 421-835aa cR | CATAGATCCACGACCTTCGATCAGATCC                  |
| TRIM28-luc cF 70         | GGTACCGAGCTCTTACGCGT<br>CGTTGGCCAGGCTGCTCTCGA |
| TRIM28-luc cR 70         | CGAGCCCGGGCTAGCACGCGT<br>CTGTCCGGGCCCCCATCCTC |
| RB1-gRNA cF              | CACCGATAGGCTAGCCGATACTG                       |
| RB1-gRNA cR              | AAACCAGTGTATCGGCTAGCCTATC                     |
| TRIM28 gRNA cF1          | CACCG ACGTTCACCATCCCGAGACT                    |
| TRIM28 gRNA cR1          | AAAC AGTCTCGGGATGGTGAACGT C                   |
| TRIM28 gRNA cF2          | CACCG TCTGTGTGAGACCTGTGTAG                    |
| TRIM28 gRNA cR2          | AAAC CTACACAGGTCTCACACAGA C                   |
|                          |                                               |
|                          |                                               |
|                          |                                               |
|                          |                                               |
|                          |                                               |
|                          |                                               |
|                          |                                               |
